# Supplementary material for: IGF2BP2 Mediated the Positive Effects of the NAD + in the Decidualization of the Human Endometrial Stromal Cells
Source: Research Square preprint supplement (doi:10.21203/rs.3.rs-7449475/v1), 2025-09-16

**Supplementary Information**

**Table S1 GSEA analysis classical datasets definition from Molecular Signatures Database (MSigDB)**

| **MSigDB-database** | **Database_full_name** | **Data_set_definition** |
| --- | --- | --- |
| **C2** | human curated datasets from Molecular Signatures Database (MSigDB) | Classical human gene datasets from multiple reliable sources |
| **C3** | Human regulatory target gene datasets from Molecular Signatures Database (MSigDB) | Transcription factor target gene sets and microRNA target gene sets |
| **C5** | human curated datasets based on GO ontology from Molecular Signatures Database (MSigDB) | Classical human GO ontology gene datasets |
| **C8** | Cell type signiture gene datasets from Molecular Signatures Database (MSigDB) | Curated cluster makers from single cell sequencing studies |

**Table S2 The record for QPCR primers of target genes**

| **Genesymbol** | **Genbank Accession** | **Primer Sequences (5' to 3')** | **Amplicon Size (bp)** |
| --- | --- | --- | --- |
| *β-actin* | NM_001101.3 | F: GATGACCCAGATCATGTTTGAGAC | 112 |
| R:GGAGTCCATCACGATGCCAGT |
| *BAD* | BT008034.1 | F: CCGGAGGATGAGTGACGAGTT | 125 |
| R: CCCACCAGGACTGGAAGACT |
| *GSS* | NM_000178.4 | F: GCCTGAATCGCTCAGACTACA | 70 |
| R: CCCAAAGCTGGCAGAGATGGT |
| *POLD1* | AB209560.1 | F: CCGCTCCTACACGCTCAAT | 106 |
| R: GGTCTGGTCGTTCCCATTCT |

**Table S3 The medical examination record for healthy donors**

| **Record_type** | **Healthy donor 1** | **Healthy donor 2** | **Healthy donor 3** |
| --- | --- | --- | --- |
| **Age(years)** | 29-32 | 29-32 | 29-32 |
| **Duration of infertility (years)** | 1-2 | 1-2 | 1-2 |
| **Infertility diagnosis** | Secondary infertility | Secondary infertility | Secondary infertility |
| **BMI(kg/m2)** | 20-23 | 20-23 | 20-23 |
| **Endometiral thickness (mm)** | 8-10 | 8-10 | 8-10 |
| **Endometrial pathology** | proliferative phase | proliferative phase | proliferative phase |
| **Pathological endometritis** | No | No | No |
| **Antral follicle count** | 10-11 | 9-10 | 11-12 |
| **Baseline E2 (pg/mL)** | 30-50 | 30-50 | 30-50 |
| **Baseline FSH (IU/L)** | 4-10 | 4-10 | 4-10 |
| **Baseline LH (IU/L）** | 4-10 | 4-10 | 4-10 |
| **Baseline P (pg/mL)** | ＜1 | ＜1 | ＜1 |
| **Assisted Pregnancy Outcome** | Clinical Pregnancy | Clinical Pregnancy | Clinical Pregnancy |

**Note:** BMI, Body Mass Index. FSH, Follicle-Stimulating Hormone. LH, Luteinizing Hormone. P, Progesterone

**Table S4 The NAD/NADH ratio was measured in primary human endometrial stromal cells under different treatments of NMN concentrations**

| **0 M NMN** | **50 M NMN** | **100 M NMN** | **200 M NMN** | **500 M NMN** | **100 M NMN** |
| --- | --- | --- | --- | --- | --- |
| 0.0240 | 0.0374 | 0.0378 | 0.0964 | 0.0627 | 0.0741 |
| 0.0151 | 0.0253 | 0.0279 | 0.0780 | 0.0780 | 0.0673 |
| 0.0392 | 0.0375 | 0.0700 | 0.0925 | 0.0162 | 0.0325 |

**Table S5 Differential expression genes between different groups of hEnSCs**

| **Total_DEGs** | **Up-regulated DEGs** | **Down-regulated DEGs** | **Comparison_group** |
| --- | --- | --- | --- |
| 387 | 135 | 252 | CG_vs_BG |
| 492 | 174 | 318 | EG_vs_BG |
| 20 | 10 | 10 | EG_vs_CG |

**Supplemental figure legends and figures**

**Fig.S1 The measurement of the NAD+ / NADH ratio were acquired in endometrial stromal cells aftter the addition of different concentrations of NMN**

**Fig.S2 The overview of expression patterns in all identified genes were demonstrated for all three treatment groups**

**a.** The heatmap of all identified genes was shown for all three treatment groups; **b.** PCA graph of all the samples were drawn from three different treatment groups.

**Fig.S3 The leading edge analysis of Cell cycle and apoptosis related enriched pathways were preformed between the EG group and the CG group**

**a.** The correlationship diagram was shown for the five significantly enriched pathways related to cell cycle and apopotosis in the comparison between the EG group and the CG group, and the deeper blue color represents higher correlation between the pathways; **b.** The heatmap of enriched gene from the five significantly enriched pathways related to cell cycle and apopotosis was drawn, the deeper blue color represents the more decreased levels of enriched genes.

**Fig.S4 The key changes were demonstrated by the levels of expressed genes in the model of DNA replication pathway**

Down-regulated genes were labeled with cyan color and the no-change genes as light purple.

**FigS1**


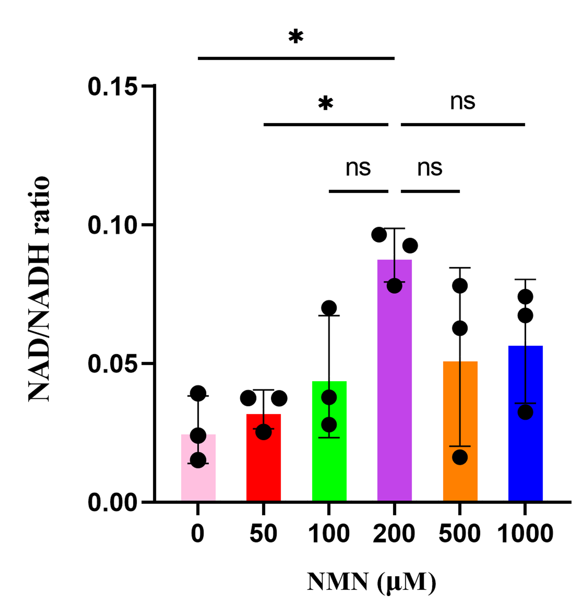


**FigS2**


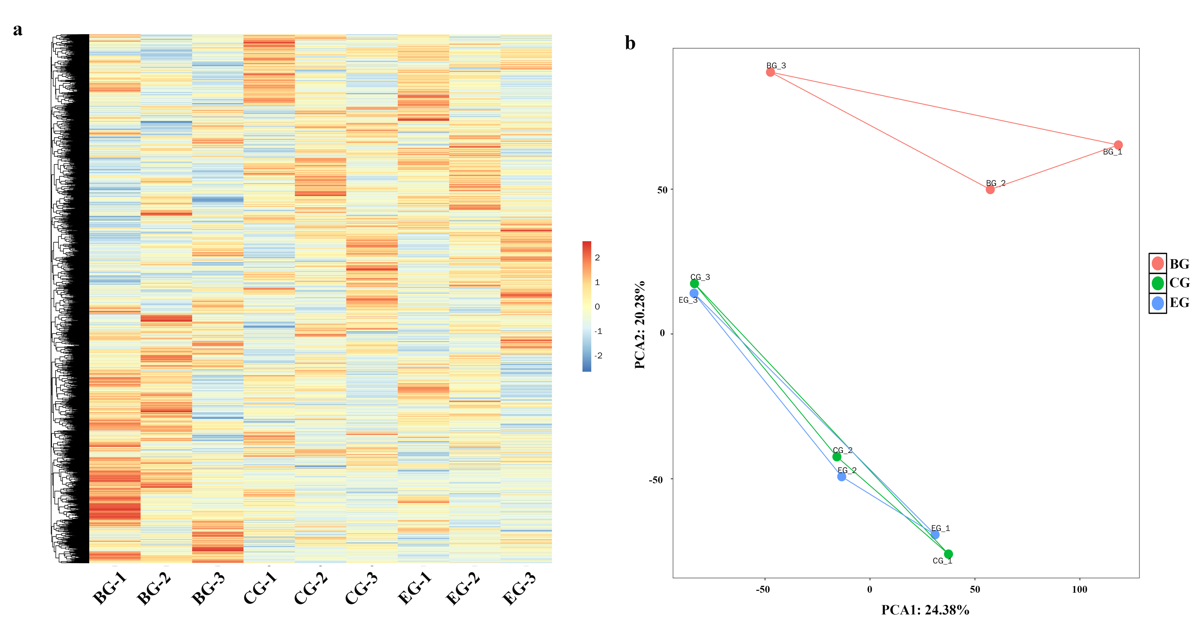


**FigS3**


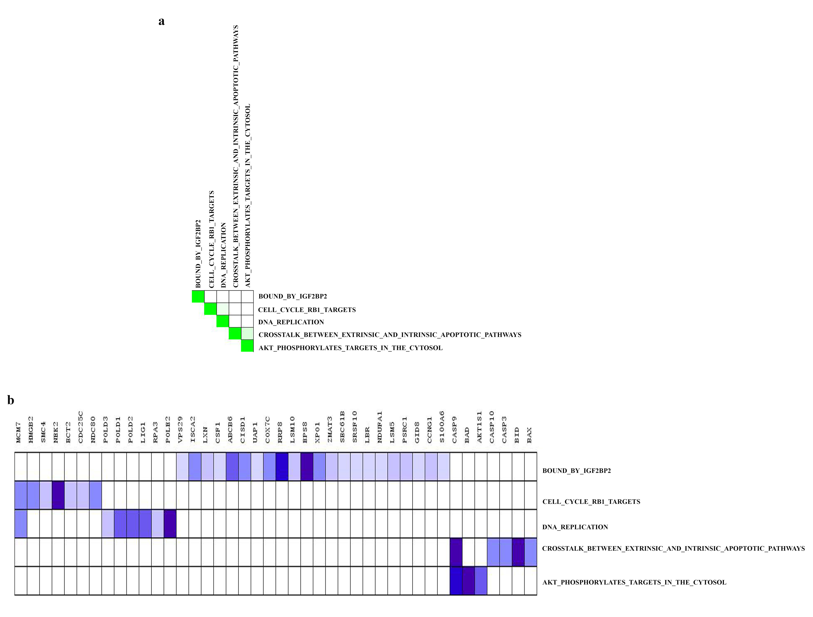


**FigS4**


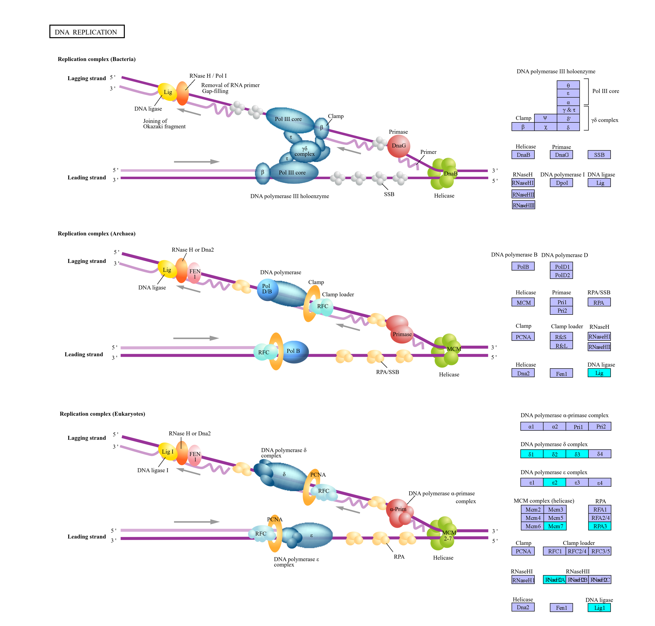

Supplement: Supplementary file 1 [file 4c3bc6ca9561780c804ac919.docx]
