# Supplementary material for: IGF2BP2 Mediated the Positive Effects of the NAD + in the Decidualization of the Human Endometrial Stromal Cells
Source: Research Square preprint supplement (doi:10.21203/rs.3.rs-7449475/v1), 2025-09-16

**Fig4** The pathway of Cell cycle was enriched for the CG group in GSEA analysis between the EG group and the CG group and several key genes were examined by QPCR and Western blot

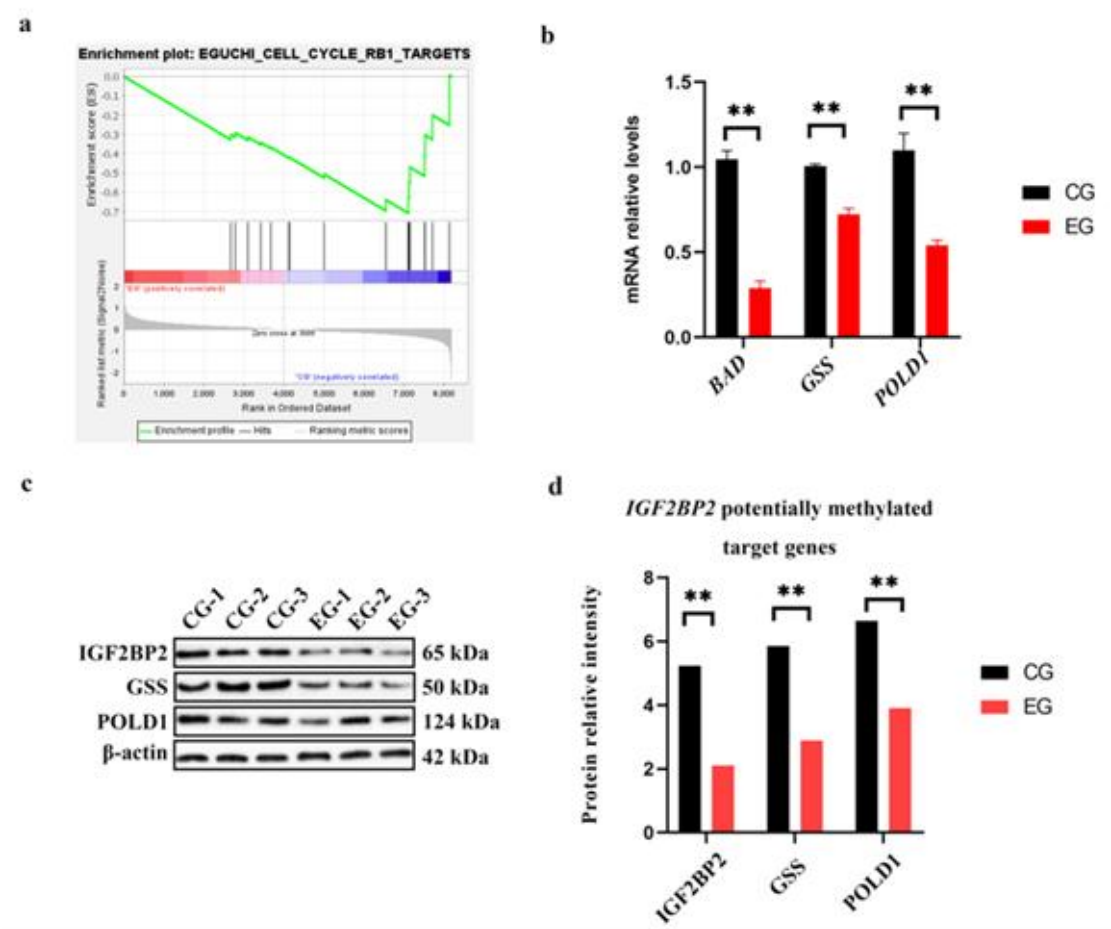

The original image for Fig. 4c is shown below:  
IGF2BP2:

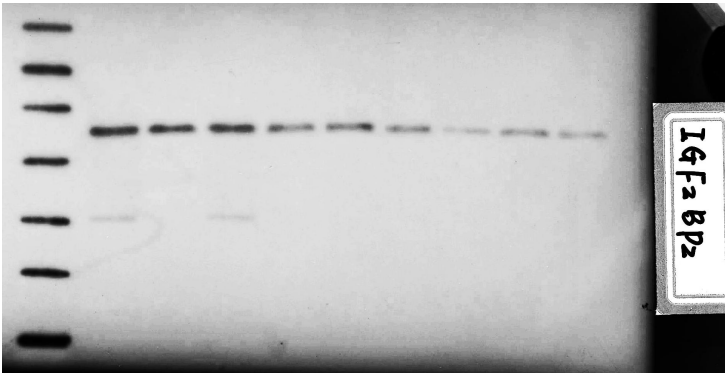

GSS:

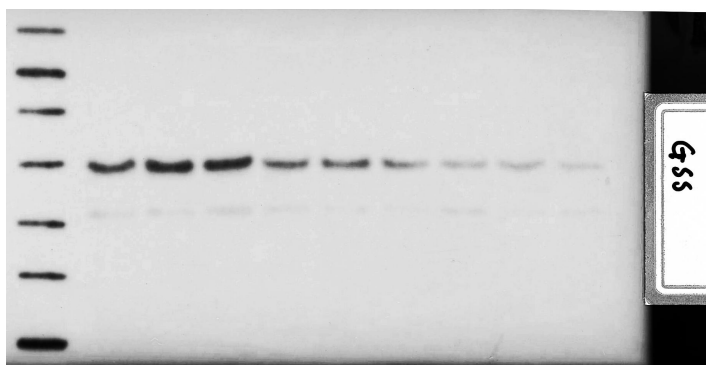

**POLD1**

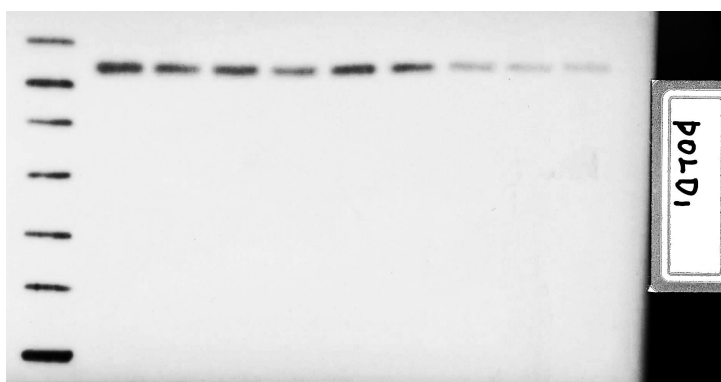

**$\beta$ -actin**

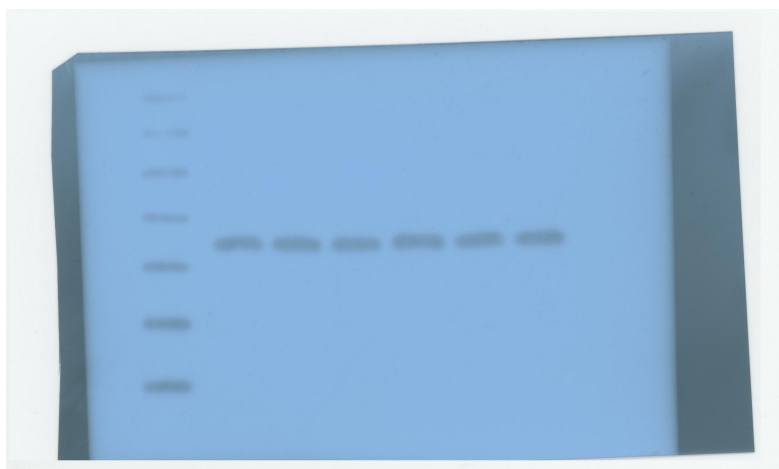

**Fig5** The AKT phosphorylates targets in cytosol was enriched for the CG group in GSEA analysis between the EG group and its key enriched genes were examined at their protein levels

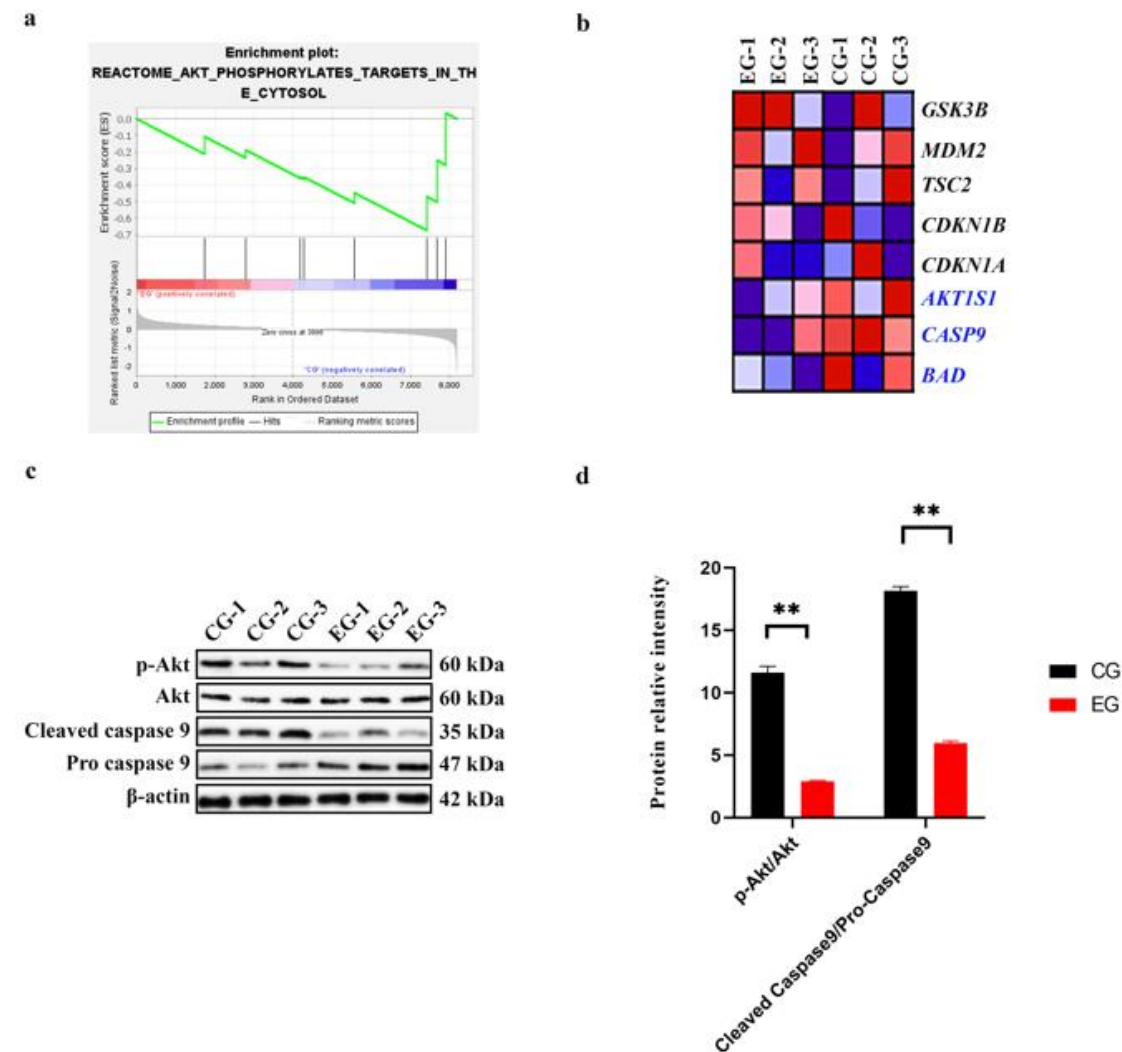

The original image for Fig. 5c is shown below:  
p-Akt:

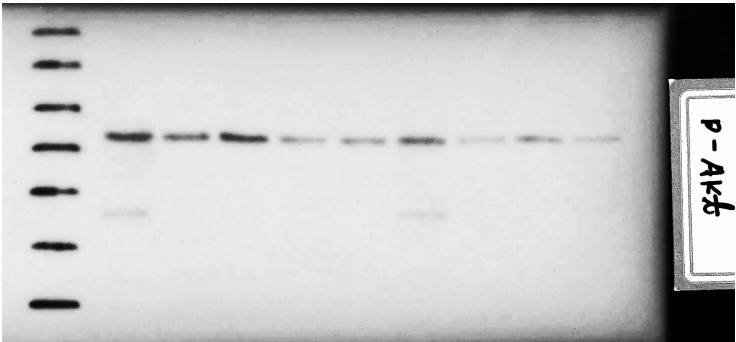

Akt:

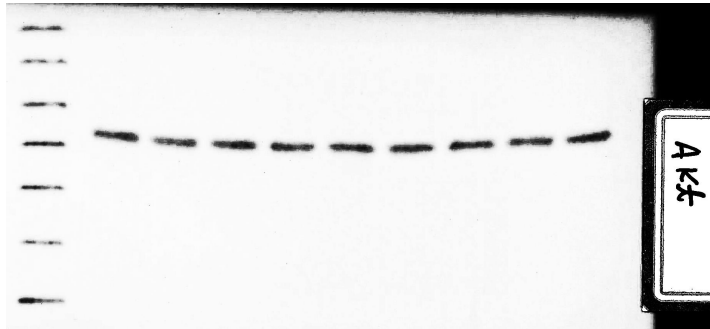

Cleaved Caspase9:

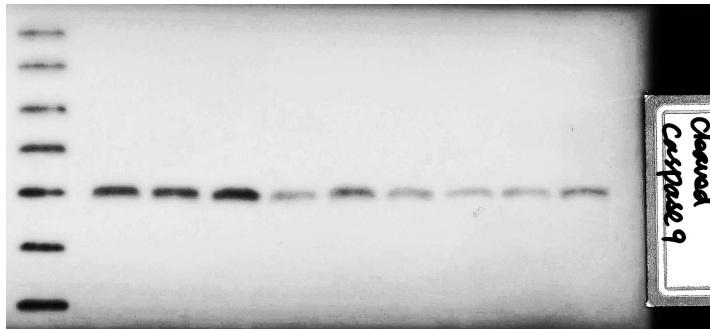

Pro Caspase9:

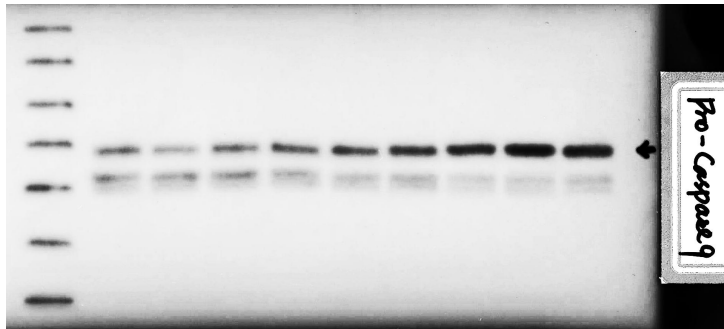

$\beta$ -actin:

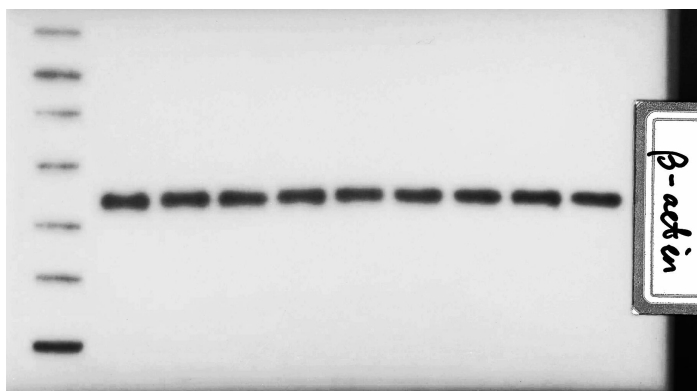

Supplement: Supplementary file 1 [file e9d52024f81b9b22889cdee7.pdf]
