# Supplementary material for: IGF2BP2 Mediated the Positive Effects of the NAD + in the Decidualization of the Human Endometrial Stromal Cells
Source: Research Square preprint supplement (doi:10.21203/rs.3.rs-7449475/v1), 2025-09-16
Supplement: Supplementary file 2 [file 4ce6e804a4cd24f519ada94b.xlsx]

## Sheet: S6-S7
	Table S6 KEGG pathway enrichment results for EG group vs BG group
	ID	Description	pvalue	Comparison_ID	Regulation
	ko04110	Cell cycle	1.77493e-10	EG_vs_BG	down
	ko03032	DNA replication proteins	6.41451e-08	EG_vs_BG	down
	ko04114	Oocyte meiosis	0.000519149	EG_vs_BG	down
	ko04914	Progesterone-mediated oocyte maturation	0.0199187	EG_vs_BG	down
	ko03110	Chaperones and folding catalysts	9.53631e-05	EG_vs_BG	up
	ko04141	Protein processing in endoplasmic reticulum	0.0319173	EG_vs_BG	up
	Table S7 KEGG pathway enrichment results for CG group vs BG group
	ID	Description	pvalue	Comparison_ID	Regulation
	ko04110	Cell cycle	3.56872e-13	CG_vs_BG	down
	ko03032	DNA replication proteins	4.14388e-06	CG_vs_BG	down
	ko04114	Oocyte meiosis	9.83104e-06	CG_vs_BG	down
	ko04914	Progesterone-mediated oocyte maturation	1.11101e-05	CG_vs_BG	down
	ko04115	p53 signaling pathway	0.000542396	CG_vs_BG	down
	ko01001	Protein kinases	0.00422003	CG_vs_BG	down
	ko00670	One carbon pool by folate	0.0311744	CG_vs_BG	down
	ko00680	Methane metabolism	0.0378627	CG_vs_BG	down
	ko04218	Cellular senescence	0.0424909	CG_vs_BG	down
	ko01009	Protein phosphatases and associated proteins	0.0478764	CG_vs_BG	down
	ko05166	Human T-cell leukemia virus 1 infection	0.0489159	CG_vs_BG	down
	ko04216	Ferroptosis	0.00849806	CG_vs_BG	down
	ko04142	Lysosome	0.00849806	CG_vs_BG	up
	ko00190	Oxidative phosphorylation	0.017435	CG_vs_BG	up
	ko03110	Chaperones and folding catalysts	0.0429404	CG_vs_BG	up
	Table S8 Significantly enriched datasets for GSEA analysis between EG group and CG group (NOM p-val<0.01, FDR q-val<0.25)
	Pathway_name	NES	NOM p-val	FDR q-val	LEADING EDGE	Comparison_ID	Regulation	MSigDB-database
	KEGG_MEDICUS_REFERENCE_LONG_PATCH_BER	-1.87422	0	0.243395	tags=42%, list=11%, signal=47%	EG_vs_CG	down	C2
	SPIRA_SMOKERS_LUNG_CANCER_UP	-1.84869	0	0.177807	tags=28%, list=7%, signal=30%	EG_vs_CG	down	C2
	BIOCARTA_HCMV_PATHWAY	-1.84012	0	0.149699	tags=29%, list=1%, signal=29%	EG_vs_CG	down	C2
	REACTOME_RESOLUTION_OF_AP_SITES_VIA_THE_MULTIPLE_NUCLEOTIDE_PATCH_REPLACEMENT_PATHWAY	-1.83548	0	0.1373	tags=33%, list=11%, signal=38%	EG_vs_CG	down	C2
	FLECHNER_PBL_KIDNEY_TRANSPLANT_OK_VS_DONOR_DN	-1.83086	0	0.11924	tags=24%, list=10%, signal=26%	EG_vs_CG	down	C2
	REACTOME_AKT_PHOSPHORYLATES_TARGETS_IN_THE_CYTOSOL	-1.8256	0	0.1072	tags=38%, list=9%, signal=41%	EG_vs_CG	down	C2
	BOUDOUKHA_BOUND_BY_IGF2BP2	-1.82544	0	0.0986001	tags=52%, list=25%, signal=70%	EG_vs_CG	down	C2
	REACTOME_CONSTITUTIVE_SIGNALING_BY_AKT1_E17K_IN_CANCER	-1.7946	0	0.165227	tags=35%, list=16%, signal=42%	EG_vs_CG	down	C2
	YAN_ESCAPE_FROM_ANOIKIS	-1.78564	0	0.158988	tags=30%, list=4%, signal=31%	EG_vs_CG	down	C2
	REACTOME_PCNA_DEPENDENT_LONG_PATCH_BASE_EXCISION_REPAIR	-1.78426	0	0.147789	tags=38%, list=11%, signal=42%	EG_vs_CG	down	C2
	WP_HOST_PATHOGEN_INTERACTION_OF_HUMAN_CORONAVIRUSES_APOPTOSIS	-1.77961	0	0.142875	tags=38%, list=19%, signal=47%	EG_vs_CG	down	C2
	REACTOME_SIGNALING_BY_NOTCH2	-1.77129	0	0.156654	tags=21%, list=2%, signal=22%	EG_vs_CG	down	C2
	KEGG_DNA_REPLICATION	-1.76473	0	0.165777	tags=30%, list=11%, signal=34%	EG_vs_CG	down	C2
	REACTOME_POLYMERASE_SWITCHING	-1.75677	0	0.162026	tags=43%, list=11%, signal=48%	EG_vs_CG	down	C2
	JIANG_VHL_TARGETS	-1.75131	0	0.15914	tags=38%, list=27%, signal=52%	EG_vs_CG	down	C2
	SA_PROGRAMMED_CELL_DEATH	-1.73595	0	0.205637	tags=56%, list=16%, signal=66%	EG_vs_CG	down	C2
	REACTOME_PROCESSIVE_SYNTHESIS_ON_THE_C_STRAND_OF_THE_TELOMERE	-1.73269	0	0.205049	tags=44%, list=12%, signal=50%	EG_vs_CG	down	C2
	REACTOME_PTK6_PROMOTES_HIF1A_STABILIZATION	-1.73113	0	0.201826	tags=40%, list=2%, signal=41%	EG_vs_CG	down	C2
	DITTMER_PTHLH_TARGETS_DN	-1.72575	0	0.202085	tags=28%, list=14%, signal=32%	EG_vs_CG	down	C2
	REACTOME_PROCESSING_OF_INTRONLESS_PRE_MRNAS	-1.72044	0	0.209572	tags=50%, list=17%, signal=60%	EG_vs_CG	down	C2
	OZANNE_AP1_TARGETS_UP	-1.71879	0	0.204307	tags=30%, list=16%, signal=36%	EG_vs_CG	down	C2
	PID_ALK1_PATHWAY	-1.71769	0	0.203019	tags=40%, list=14%, signal=46%	EG_vs_CG	down	C2
	EGUCHI_CELL_CYCLE_RB1_TARGETS	-1.71568	0	0.201464	tags=44%, list=13%, signal=50%	EG_vs_CG	down	C2
	KEGG_MEDICUS_REFERENCE_CROSSTALK_BETWEEN_EXTRINSIC_AND_INTRINSIC_APOPTOTIC_PATHWAYS	-1.70195	0	0.236942	tags=56%, list=19%, signal=68%	EG_vs_CG	down	C2
	DACOSTA_UV_RESPONSE_VIA_ERCC3_TTD_UP	-1.69933	0	0.23843	tags=47%, list=29%, signal=65%	EG_vs_CG	down	C2
	HOFFMANN_LARGE_TO_SMALL_PRE_BII_LYMPHOCYTE_DN	-1.69884	0	0.23134	tags=42%, list=18%, signal=51%	EG_vs_CG	down	C2
	REACTOME_DNA_REPLICATION_INITIATION	-1.69884	0	0.224756	tags=20%, list=1%, signal=20%	EG_vs_CG	down	C2
	MIR1225_3P	-2.00376	0	0.05	tags=47%, list=15%, signal=55%	EG_vs_CG	down	C3
	AR_03	-2.00238	0	0.05	tags=30%, list=13%, signal=35%	EG_vs_CG	down	C3
	Table S9 GSEA leading edge analysis for enriched down-regulated gene sets related to IGF2BP2 between EG group and CG group
	Pathway_NAME	NES	NOM p-val	FDR q-val	LEADING EDGE	Comparison_ID	Regulation	MSigDB-database
	BOUDOUKHA_BOUND_BY_IGF2BP2	-1.82544	0	0.0986001	tags=52%, list=25%, signal=70%	EG_vs_CG	down	C2
	REACTOME_AKT_PHOSPHORYLATES_TARGETS_IN_THE_CYTOSOL	-1.8256	0	0.1072	tags=38%, list=9%, signal=41%	EG_vs_CG	down	C2
	KEGG_DNA_REPLICATION	-1.76473	0	0.165777	tags=30%, list=11%, signal=34%	EG_vs_CG	down	C2
	EGUCHI_CELL_CYCLE_RB1_TARGETS	-1.71568	0	0.201464	tags=44%, list=13%, signal=50%	EG_vs_CG	down	C2
	KEGG_MEDICUS_REFERENCE_CROSSTALK_BETWEEN_EXTRINSIC_AND_INTRINSIC_APOPTOTIC_PATHWAYS	-1.70195	0	0.236942	tags=56%, list=19%, signal=68%	EG_vs_CG	down	C2
	Table S10 GSEA leading edge analysis for Enriched down-regulated gene sets related to DNA replication between EG group and CG group
	Pathway_NAME	NES	NOM p-val	FDR q-val	LEADING EDGE	Comparison_ID	Regulation	MSigDB-database
	GOBP_ANAPHASE_PROMOTING_COMPLEX_DEPENDENT_CATABOLIC_PROCESS	-1.98389	0	0.193698	tags=80%, list=8%, signal=87%	EG_vs_CG	down	C5
	GOCC_DNA_POLYMERASE_COMPLEX	-1.94129	0	0.188635	tags=38%, list=12%, signal=43%	EG_vs_CG	down	C5
	GOMF_ATPASE_ACTIVATOR_ACTIVITY	-1.85006	0	0.230405	tags=17%, list=7%, signal=18%	EG_vs_CG	down	C5
